# Supplementary material
Source: PubMed Central journal article supplement (PMC3524397)
Supplement: NIHMS415365-supplement-Supp_FigureS1-S3_TableS1.pdf [file NIHMS415365-supplement-Supp_FigureS1-S3_TableS1.pdf]

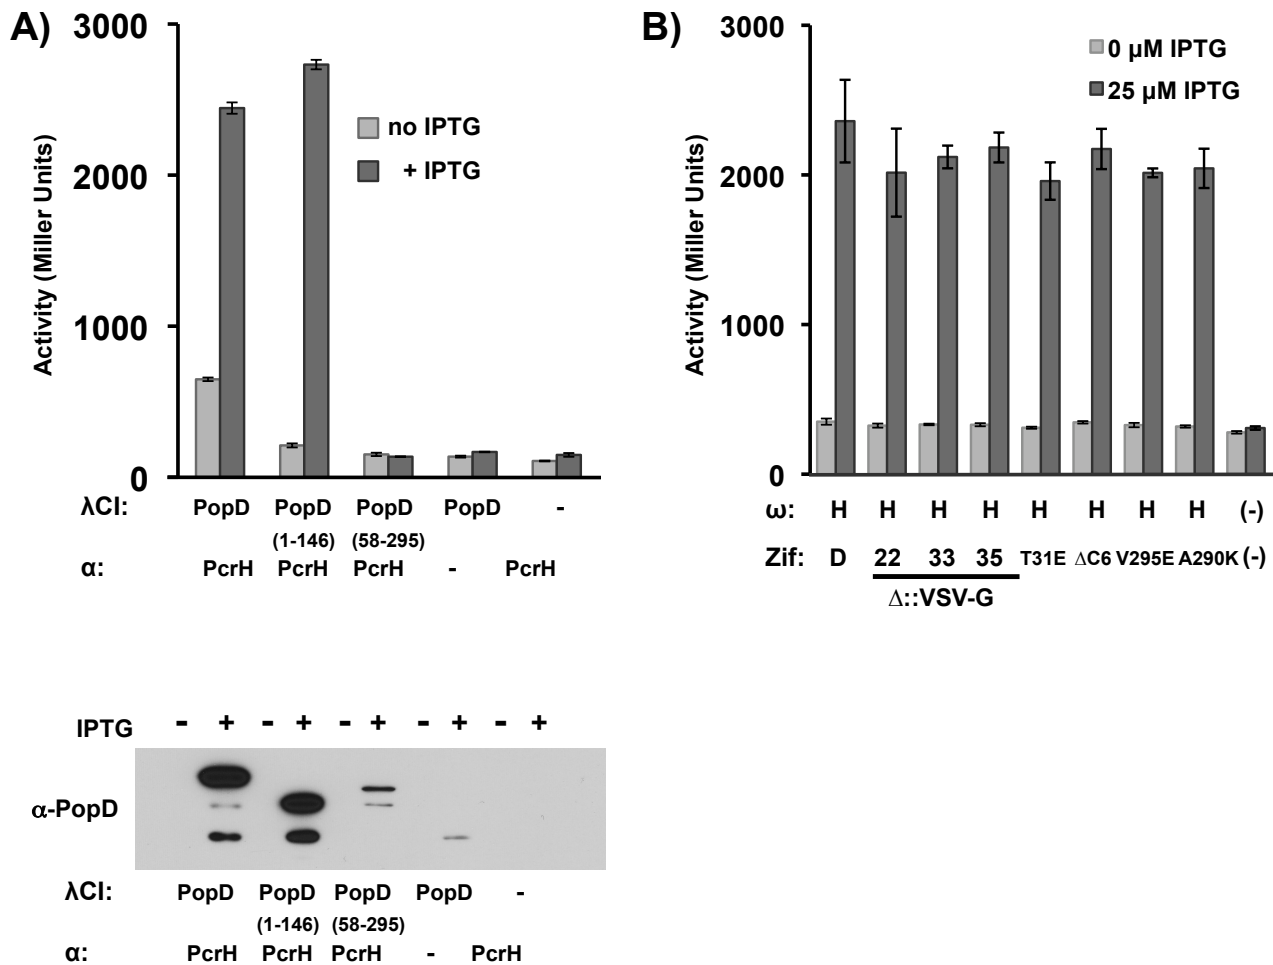

**Fig. S1. PopD N-TES and C-TES mutants retain the ability to bind to PcrH.**

The interaction between PcrH and PopD was assayed by two-hybrid analysis. (A) PcrH was expressed as a fusion to RNA polymerase subunit alpha, and the indicated portion of PopD was fused to lambda cl [full length, the amino-terminal half of PopD (1-146) or the C-terminus excluding the chaperone binding domain (58-295)]. Expression of the fusion proteins was induced with 50 $\mu$ M IPTG, with the exception of the cl-PopD(58-295) fusion protein, which was induced with 250 $\mu$ M IPTG. Cell extracts of the assayed strains were separated by SDS-PAGE and probed for the presence of PopD by Western blot (panel below the beta-galactosidase assay results). As in *P. aeruginosa*, PopD was unstable in the absence of PcrH or when the fragment fused to cl was unable to bind to PcrH (PopD 58-295). (B) PcrH was expressed as a fusion to RNA polymerase subunit  $\omega$  and PopD TES mutants were expressed as fusions to the monomeric DNA binding protein Zif. Expression was induced with 25  $\mu$ M IPTG. Protein interaction was measured in *E. coli* KDZif1 by virtue of their ability to activate *lacZ* expression from a test promoter.

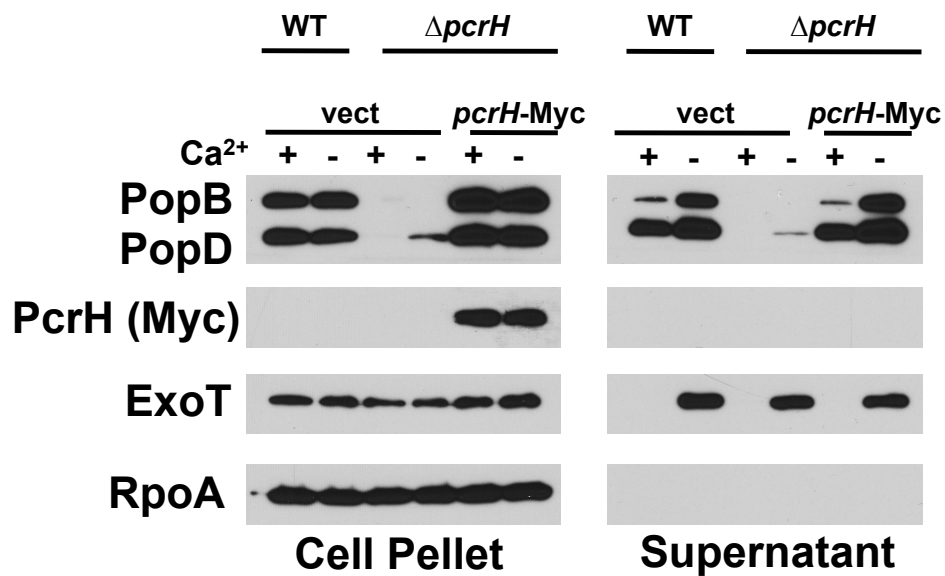

**Fig. S2. PcrH stabilizes PopB and PopD in the cytoplasm of *P. aeruginosa* PAO1.** Expression and secretion of PopB and PopD was assayed by RECC assay in a *pcrH* null mutant complemented with a plasmid expressing a Myc-tagged version of PcrH or vector alone. The expression and secretion of PopB and PopD was compared to the parental strain (PAO1F  $\Delta fleQ$ ). Expression of the Myc-tagged PcrH was detected by Western blot. The RNA-polymerase alpha subunit served as loading control and ExoT export was detected to illustrate that the type III secretion machinery is intact and otherwise functioning normally.

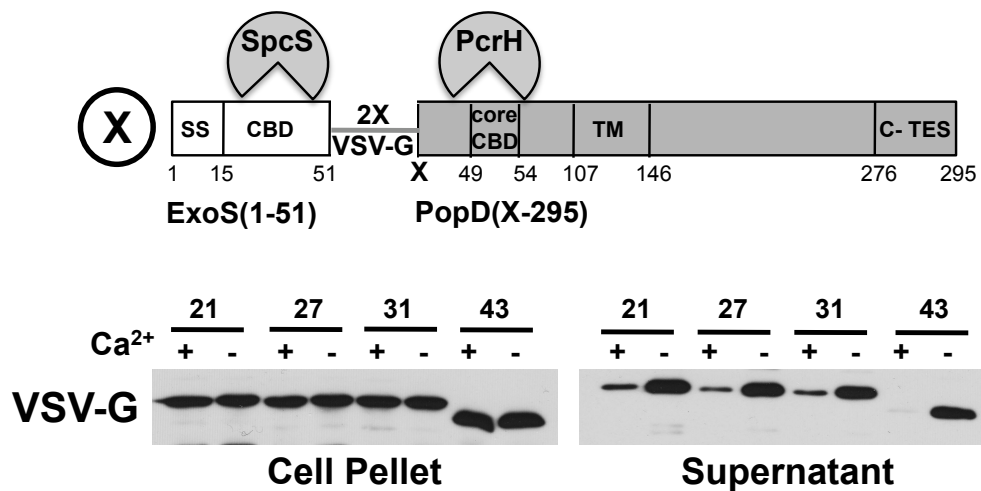

**Fig. S3. A chaperone-adjacent domain of PopD is required for export of the translocator before effectors.**

Fusions of ExoS(1-51) to amino-acids 21-295(21), 27-295(27), 31-295(31) or 43-295(43) [ExoS(1-51)-VSV-G-PopD(X-295)] were expressed in PAO1F  $\Delta fleQ \Delta exoS \Delta popBD$  and their export was monitored in the presence or absence of calcium. The presence of the fusion protein in the cell pellet or supernatant fractions was determined by Western blot directed against the common VSV-G epitope.

**Table S1.** Primers used in this study

| Primer Name      | Sequence (5' to 3')                                                                                         | Description                                                                                                |
|------------------|-------------------------------------------------------------------------------------------------------------|------------------------------------------------------------------------------------------------------------|
| HisMBP-5R        | ATATAgaattcTAAGGAGGCGCCCCCATGCACCAC<br>CATCACCATCACCATCACAAAATCGAAGAAGGT<br>AAACTGG                         | 5' primer to create N-terminally His tagged malE (MBP) without signal sequence for fusions with EcoRI site |
| malE-3K          | ATATAggtaccTgcggccgcCTTGGTGATACGAGTCT<br>GCGC                                                               | 3' primer to amplify malE, inserts NotI site in polylinker, with KpnI site                                 |
| popD5R           | AAAAAgaattcTTAGGAGGCGCCCCCATGATCGAC<br>ACGCAATATTCCCT                                                       | 5' primer for popD ORF with EcoRI site                                                                     |
| popDEX3          | AAAAAaagcttCGCGCGGAGACGGCTCAGACCACT                                                                         | 3' popD primer with HindIII site                                                                           |
| popDd2-10-Eco-5  | AAAAAgaattcTTAGGAGGCGCCCCCATGACCCAG<br>GCCGCGATCCCCTCCGA                                                    | 5' primer to delete codons 2-10 from popD with EcoRI site                                                  |
| popDd11-21-Eco-5 | AAAAAGAATTCTTAGGAGGCGCCCCCATGATCG<br>ACACGCAATATTCCCTGGCGGCTCCCGGCGCC<br>GCCGGGCGTTCC                       | 5' primer to delete codons 11-20 from popD with EcoRI site                                                 |
| S20-D21-eco-5    | AAAgaattcTTAGGAGGCGCCCCCATGCATATTC<br>AATCGCTTCAGCAGAGTCCGTCTTTGCGCCGTCG<br>AATTGCACCAGGCCGCGCTCCCGGCGCCGCC | 5' primer to fuse codons 1-20 of exoS to popD codon 21+ with EcoRI site                                    |
| DS-5R            | AAAAAgaattcATCAGGAGAAGGCAACCATCATGA<br>TCGACACGCAATATTCCCTGGCGGCTACCCAGG<br>CCGCGATCCCCT                    | 5' primer to fuse codons 1-20 of popD to exoS codon 21+ with EcoRI site                                    |
| DS-5             | GCGGCTACCCAGGCCGCGATCCCCTCCGAGCC<br>GATCAGTGGGCGTTTGGGACAGATTGAGG                                           | 5' primer to fuse codons 1-20 of popD to exoS codon 21+                                                    |
| exoS3H           | AAAAAaagcttGGTCAGGCCAGATCAAGGCCGCG<br>CAT                                                                   | 3' exoS primer with HindIII site                                                                           |
| popDdC20-3H      | AAAAAaagcttTCACTGCAGGACGTCTTCATGAA<br>GCCGGCA                                                               | 3' primer to delete the last 20 codons of popD with HindIII site                                           |
| popB5R           | AAAAAgaattcTTAGGAGGCGCCCCCATGAATCCG<br>ATAACGCTTGAA                                                         | 5' primer for popB ORF with EcoRI site                                                                     |
| popBEX3          | AAAAAaagcttGACGTCTCTCAGATCGCTGCCGG<br>T                                                                     | 3' popB primer with HindIII site                                                                           |
| popBdC20-3H      | AAAAAaagcttTCAGAAGATCCGCTCCATGATTTCC<br>TGGAAT                                                              | 3' primer to delete the last 20 codons of popB with HindIII site                                           |
| popDdC6-3-H      | AAAAAaagcttTCAACGCCAGGCCTGGTTATGGCT<br>C                                                                    | 3' primer to delete the last 6 codons of popD with HindIII site                                            |
| popDA290K-3H     | AAAAAaagcttTCAGACCACTCCGGCCGCTTACG<br>CCAGGCCTGGTTATGGCTCTGGGT                                              | 3' primer to make popD A290K mutation with HindIII site                                                    |

|                    |                                                                                            |                                                                                      |
|--------------------|--------------------------------------------------------------------------------------------|--------------------------------------------------------------------------------------|
| popDV295E-3H       | AAAAAaagcttCGCGCGGAGACGGCTCACTCCACT<br>CCGGCCGCGCA                                         | 3' primer to make popD V295E<br>mutation with HindIII site                           |
| popDA290C-3H       | AAAAAaagcttTCAGACCACTCCGGCCGCGCAACG<br>CCAGGCCTGGTTATG                                     | 3' primer to make popD A290C<br>mutation with HindIII site                           |
| popDV295C-3H       | AAAAAaagcttTCAGCACACTCCGGCCGCGCACG<br>CCAGGCCTGGTTATG                                      | 3' primer to make popD V295C<br>mutation with HindIII site                           |
| popDT31E-3-1       | CGGCGCCGCGGGCGTTCCGTCGGCGAGCCG<br>CAAGCGGCTGCGGACCTGCCGC                                   | 5' primer to make popD T31E<br>mutation                                              |
| popDT31E-5-2       | GCGGCAGGTCCGCAGCCGCTTGCGGCTCGCCG<br>ACGGAACGCCCGGCGGCCG                                    | 3' primer to make popD T31E<br>mutation                                              |
| popDd100-170-3-1   | TCCAGCGCGACAACGAGAACCAGGCGCTTGGC<br>AAGACCT                                                | 5' primer to delete codons 100-170<br>of popD                                        |
| popDd100-170-5-2   | AGGTCTTGCCAAGCGCCTGGTTCTCGTTGTCGC<br>GCTGGA                                                | 3' primer to delete codons 100-170<br>of popD                                        |
| popDd150-220-3-1   | TGAAGAACGGCAAGGCCATCCAGTCCTTCGTCC<br>AGATGGCCAA                                            | 5' primer to delete codons 150-220<br>of popD                                        |
| popDd150-220-5-2   | TTGGCCATCTGGACGAAGGACTGGATGGCCTTG<br>CCGTTCTTCA                                            | 3' primer to delete codons 150-220<br>of popD                                        |
| popDd190-270-3-1   | TCGTCGGCAAGGTCTGGGCGAAGGACGTCCTG<br>CAGCTCATC                                              | 5' primer to delete codons 190-270<br>of popD                                        |
| popDd190-270-5-2   | GCAGGACGTCCTTCGCCCAGACCTTGCCGACG<br>ATCTTGCGA                                              | 3' primer to delete codons 190-270<br>of popD                                        |
| popDd190-280-3H    | AAAAAaagcttCAGACCACTCCGGCCGCGCACG<br>CCAGGCCTGGTTATGGCTCTGGGTCGCCCAGA<br>CCTTGCCGACGATCTTG | 3' primer to delete codons 190-280<br>of popD with HindIII site                      |
| popD(22-32)VG-5Pvu | AAAAAacgatcgCTTATACAGATATTGAAATGAATAG<br>ATTAGGAAAACAAGCGGCTGCGGACCTGCCGC<br>AGGT          | 5' primer to replace codons 22-32<br>of popD with a (1X) VSV-G tag<br>with PvuI site |
| popD(33-43)VG-3-1  | TATACAGATATTGAAATGAATAGATTAGGAAAAG<br>CGCGGGCCGACCGGGTCAACTGAA                             | 5' primer to replace codons 33-43<br>of popD with a (1X) VSV-G tag                   |
| popD(33-43)VG-5-2  | TTTTCTAATCTATTCATTTCAATATCTGTATACG<br>GCGTGCCGACGGAACGCCCGGCGGC                            | 3' primer to replace codons 33-43<br>of popD with a (1X) VSV-G tag                   |
| popD(35-45)VG-3-1  | TATACAGATATTGAAATGAATAGATTAGGAAAAG<br>CCGACCGGGTCAACTGAACGCTC                              | 5' primer to replace codons 35-45<br>of popD with a (1X) VSV-G tag                   |
| popD(35-45)VG-5-2  | TTTTCTAATCTATTCATTTCAATATCTGTATACG<br>CTTGCGGCGTGCCGACGGAACG                               | 3' primer to replace codons 35-45<br>of popD with a (1X) VSV-G tag                   |
| popD(58-68)VG-3-1  | TATACAGATATTGAAATGAATAGATTAGGAAAAG<br>AGCTGGACAGCAGCGTCGAGCTT                              | 5' primer to replace codons 58-68<br>of popD with a (1X) VSV-G tag                   |
| popD(58-68)VG-5-2  | TTTTCTAATCTATTCATTTCAATATCTGTATACA<br>CCTGGCGCGGAGCGTTCAGTTC                               | 3' primer to replace codons 58-68<br>of popD with a (1X) VSV-G tag                   |

|                |                                                                                                             |                                                                                            |
|----------------|-------------------------------------------------------------------------------------------------------------|--------------------------------------------------------------------------------------------|
| exoS5R         | AAAAAgaattcATCAGGAGAAGGCAACCATCATGC<br>ATA                                                                  | 5' exoS primer with EcoRI site                                                             |
| exoS51-2VG-Not | AAAAAgcggccgcTTTTCTAATCTATTCATTTCAAT<br>ATCTGTATATTTTCTAATCTATTCATTTCAATAT<br>CTGTATACTCACCCCTTCGGCGCGTCCTG | 3' primer to amplify exoS codons<br>1-51 with (2x) VSV-G tag and NotI<br>site              |
| popD21-5-Not   | AAAAAgcggccgcAGCTCCCGGCGCCGCCGGGCG<br>TTCCGT                                                                | 5' primer to amplify codons 21+ of<br>popD with NotI site                                  |
| popD27-5Not    | AAAAAgcggccgcACGTTCCGTCCGCACGCCGCAA<br>GCGGCT                                                               | 5' primer to amplify codons 27+ of<br>popD with NotI site                                  |
| popD31-5Not    | AAAAAgcggccgcAACGCCGCAAGCGGCTGCCGA<br>CCTGCCGCA                                                             | 5' primer to amplify codons 31+ of<br>popD with NotI site                                  |
| popD43-5Not    | AAAAAgcggccgcAGCCGCGCGGGCCGACCGGGT<br>CGAACT                                                                | 5' primer to amplify codons 43+ of<br>popD with NotI site                                  |
| popD96-5-Not   | AAAAAgcggccgcAGACAACGAGAACCAGTCGATC<br>ATCCA                                                                | 5' primer to amplify codons 96+ of<br>popD with NotI site                                  |
| pcrH5R-opt     | AAAAAGAATTTCGAAACATCAGGAGAAGGCAACC<br>ATCATGAACCAGCCGACCCCTTCCGAC                                           | optimized pcrH5R; contains region<br>upstream of exoS                                      |
| pcrH2Myc-3-1   | ATTTCTGAAGAAGATTTGGGCGAGCAGAACTG<br>ATCTCGGAGGAGGACCTGCAATGAATCCGATAA<br>CGCTTGAAC                          | 5' primer that introduces a (2X)<br>Myc tag at the C-terminus of pcrH<br>with HindIII site |
| pcrH2Myc-5-2   | CTCGCCCAAATCTTCTTCAGAAATCAACTTTTGT<br>TCAGCGTTATCGGATTCATATGCTCGATC                                         | 3' primer that introduces a (2X)<br>Myc tag at the C-terminus of pcrH                      |
| popD-5Not      | AAAAAgcggccgcAATCGACACGCAATATT                                                                              | 5' primer to fuse popD to 3' end of<br>MBP, Zif or $\omega$ with NotI site                 |
| pcrH-5Not      | AAAAAgcggccgcAAACCAGCCGACCCCTTCCGAC                                                                         | primer to fuse pcrH to 3' end of Zif<br>or omega                                           |
| pcrH3H         | AAAAAaagcttTCAAGCGTTATCGGATTCATAT                                                                           | pcrH 3' primer with HindIII site                                                           |
| fleQ-5-1       | AAAAAgaattcTACAACGATATGCTCAGCGCTT                                                                           | 5' external fleQ primer with EcoRI<br>site                                                 |
| fleQ-5-2       | AACTCGAGCCGCAAGCATGCTGAAGCGCCACAT<br>TTTGATCAGCTGCCTT                                                       | 3' fleQ deletion primer, deletes<br>codons 4-487 of fleQ                                   |
| fleQ-3-1       | TTCAGCATGCTTGCGGCTCGAGTTTCGGATGAT<br>TGACAGGTCGTTT                                                          | 5' fleQ deletion primer, deletes<br>codons 4-487 of fleQ                                   |
| fleQ-3-2       | AAAAAaagcttGATGACGATGACGCCGCCGGGA                                                                           | 3' external fleQ primer with HindIII<br>site                                               |
| 1699-5-1       | AAAAAgaattcATGCTGGCGCTGGTCCGACCAGGCG<br>T                                                                   | 5' external pcr1 primer with EcoRI<br>site                                                 |
| 1699-3-2       | AAAAAaagcttCCGACCCGGCTCATGCGGCGAGC<br>ACT                                                                   | 3' external pcr1 primer with HindIII<br>site                                               |
| 1699-5-2       | AACTCGAGCCGCAAGCATGCTGAAGGTCAATTC<br>AGAAGGCCCGTATGCCA                                                      | 3' pcr1 deletion primer, removes<br>codons 10-81                                           |

|                |                                                         |                                                                                                                                                |
|----------------|---------------------------------------------------------|------------------------------------------------------------------------------------------------------------------------------------------------|
| 1699-3-1       | TTCAGCATGCTTGCGGCTCGAGTTGAGCGCGAA<br>GAGGAGCAGCAGCATGGA | 5' pcr1 deletion primer, removes<br>codons 10-81                                                                                               |
| pcrH-5-1       | AAAAAgaattcGACGCTGGCGGTATCGATCTGGT                      | 5' pcrH external primer with EcoRI<br>site                                                                                                     |
| pcrH-5-2       | AACTCGAGCCGCAAGCATGCTGAACGGCTGGT<br>CATGGATACCTCTAGAT   | 3' pcrH null primer                                                                                                                            |
| popD3-1n       | TTCAGCATGCTTGCGGCTCGAGTTTTTCATGAAG<br>GACGTCCTGCAGCTCA  | 5' popD null primer                                                                                                                            |
| popD-3-2       | AAAAAaagcttAGGGTCAGTTGCGCTGCGAGAAT                      | 3' popD external primer with HindIII<br>site                                                                                                   |
| pcrH5R         | AAAAAgaattcGGAGGGGTATCCATGAACCAGCCG<br>ACCCCT           | 5' pcrH primer with EcoRI<br>restriction site                                                                                                  |
| ED21popD-5-1   | GAGGCGCGCACGGTCCGGCGCAGGGCTCCCG<br>GCGCCGCCGGGCGTTCC    | 5' primer to amplify popD21-295<br>and fuse to C-terminus of exsE                                                                              |
| ED21exsE-5-2   | GGAACGCCCGGCGGCGCCGGGAGCCCTGCGC<br>CGGACCGTGCGCGCCTC    | 3' primer for 5' flank to fuse exsE to<br>popD(21-295)                                                                                         |
| EDexsE-3-1     | CGTGCGGCGGCCGGAGTGGTCTGAGGTGCTGG<br>ATGCTGTTGCC         | 5' primer to amplify region<br>downstream of exsE and fuse to<br>popD                                                                          |
| EDpopD-3-2     | GGCAACAGCATCCAGCACCTCAGACCACTCCG<br>GCCGCCGCACG         | 3' primer to amplify popD and fuse<br>to region downstream of exsE                                                                             |
| 1711-5-1       | AAAAAgaattcGCCGAGTTCGCAGGCCGTATCGGT                     | 5' flanking primer for exsE with<br>EcoRI site                                                                                                 |
| 1711-3-2       | AAAAAaagcttCAATCGTTGCCAGATCTTTCTT                       | 3' flanking primer for exsE with<br>HindIII site                                                                                               |
| EinsD-5-1      | CGGCATGAGGGTTTTGAGCGGCCCATGATCGA<br>CACGCAATATTCCCTG    | 5' primer, amplifies 5' end of popD,<br>replace codons 108-143 of popD<br>with exsE (-ATG and TGA), exsE<br>5'flank (to cross into exsE locus) |
| EinsDflank-5-2 | CAGGGAATATTGCGTGTGATCATGGGGCCGCT<br>CAAACCCTCATGCCG     | 3' primer to amplify 5' flank next to<br>exsE (X-over partner is EinsD-5-1)                                                                    |
| EinsD-E5       | CAGTCGATCATCCACGCGCAGAAGAAAATCGAA<br>TCGATTTCCCGGTG     | 5' primer, amplifies exsE, fuse to 5'<br>end of popD                                                                                           |
| EinsD-D5-2     | CACCGCGCAAATCGATTGATTTTCTTCTGCGC<br>GTGGATGATCGACTG     | 3' primer, amplifies 5' end of popD,<br>pair with EinsD-5-1                                                                                    |
| EinsDflank-3-1 | GAGGCGCGCACGGTCCGGCGCAGGAAGAACG<br>GCAAGGCCATCAGTCAA    | 5' primer, amplifies 3' end of popD                                                                                                            |
| EinsD-E3       | TTGACTGATGGCCTTGCCGTTCTTCTGCGCCG<br>GACCGTGCGCGCCTC     | 3' primer, amplifies exsE                                                                                                                      |
| EinsDflank-3-2 | AAAAAaagcttACGCCAGGCCTGGTTATGGCTCTG                     | 3' primer, amplifies 3' end of popD,<br>before dC6 start, with HindIII site                                                                    |

|                |                                                                                    |                                                                                        |
|----------------|------------------------------------------------------------------------------------|----------------------------------------------------------------------------------------|
| pcrG2-5-1      | AAAAAgaattcCTGCCGGTGCTGTCCTACCAGGAG                                                | 5' primer for pcrG 5' flank with EcoRI site                                            |
| pcrG2-3-2      | AAAAAaagcttCCGCGGTCAGCGCCTTGAGCTCGT                                                | 3' primer for pcrG 3' flank with HindIII site                                          |
| Gd30-40-5-2    | CAGCAGCTCGCCGGCGTCCGCCAGGCGGCCG<br>CGTTCCTCGCTG                                    | 3' primer to delete codons 30-40 of pcrG                                               |
| Gd30-40-3-1    | CAGCGAGGAACGCGGCCGCCTGGCGGACGCC<br>GGCGAGCTGCTG                                    | 5' primer to delete codons 30-40 of pcrG                                               |
| pcrGd60-70-5-2 | CTGCGTCCGGCTGGGAACTGCGGGCGGCTCGCG<br>CCAGCTCTCG                                    | 3' primer to delete codons 60-70 of pcrG                                               |
| pcrGd60-70-3-1 | CGAGAGCTGGCGCGAGCCGCCCGCAGTTCCCA<br>GCCGACGCAG                                     | 5' primer to delete codons 60-70 of pcrG                                               |
| pcrH-3-2       | AAAAAaagcttTCTCGACTTCGCCGGTGATTTT                                                  | 3' external pcrH primer with HindIII site                                              |
| H-Mfel-5-2     | GAAGCCCAGCGCATAcattgCTCCAGGGTGTCTT<br>C                                            | 3' primer, introduces silent Mfel site in pcrH at codon 38-39                          |
| H-Mfel-3-1     | GAGGACACCCTGGAGcaattgTATGCGCTGGGCTT<br>C                                           | 5' primer, introduces silent Mfel site in pcrH at codon 38-39                          |
| CMyc2-3H       | AAAAAaagcttTCACAGGTCCTCCTCCGAGAT                                                   | 3' primer to amplify genes tagged at C-terminus with 2xMyc tag                         |
| Hmut45         | CTGGAGcaattgTATGCGCTGGGCTTCNNNCAGTA<br>CCAGGCGGGCAAGTGG                            | 5' pcrH mutagenesis primer, Asn45 mutated with silent Mfel site in pcrH at codon 38-39 |
| Hmut46         | CTGGAGcaattgTATGCGCTGGGCTTCAACNNNTA<br>CCAGGCGGGCAAGTGGGAC                         | 5' pcrH mutagenesis primer, Gln46 mutated with silent Mfel site in pcrH at codon 38-39 |
| Hmut49         | CTGGAGcaattgTATGCGCTGGGCTTCAACCAGTA<br>CCAGNNNGGCAAGTGGGACGACGCGCAG                | 5' pcrH mutagenesis primer, Ala49 mutated with silent Mfel site in pcrH at codon 38-39 |
| Hmut50         | CTGGAGcaattgTATGCGCTGGGCTTCAACCAGTA<br>CCAGGCGNNNAAGTGGGACGACGCGCAGAAG             | 5' pcrH mutagenesis primer, Gly50 mutated with silent Mfel site in pcrH at codon 38-39 |
| Hmut51         | CTGGAGcaattgTATGCGCTGGGCTTCAACCAGTA<br>CCAGGCGGGCANNNTGGGACGACGCGCAGAAGA<br>TC     | 5' pcrH mutagenesis primer, Lys51 mutated with silent Mfel site in pcrH at codon 38-39 |
| Hmut53         | CTGGAGcaattgTATGCGCTGGGCTTCAACCAGTA<br>CCAGGCGGGCAAGTGGNNNGACGCGCAGAAGA<br>TCTTCAG | 5' pcrH mutagenesis primer, Asp53 mutated with silent Mfel site in pcrH at codon 38-39 |



|                |                                                                                 |                                                                                        |
|----------------|---------------------------------------------------------------------------------|----------------------------------------------------------------------------------------|
| Hmut54         | CTGGAGcaattgTATGCGCTGGGCTTCAACCAGTACCAGGCGGGCAAGTGGGACNNNGCGCAGAAGATCTTCCAGGCAC | 5' pcrH mutagenesis primer, Asp54 mutated with silent MfeI site in pcrH at codon 38-39 |
| pcrHd46-71-5-2 | GCAGGCGCCCAGGCCGAGAAAGTAGTTGAAGCCAGCGCATAGAGCTG                                 | 3' primer to delete pcrH codons 46-71                                                  |
| pcrHd46-71-3-1 | CAGCTCTATGCGCTGGGCTTCAACTACTTTCTCGCCTGGGCGCCTGC                                 | 5' primer to delete pcrH codons 46-71                                                  |
| popD-3Asc      | AAAAAGGCGCGCCTCAGACCACTCCGGCCGCCGCA                                             | 3' primer to clone PopD ORF into pAC $\lambda$ CI35                                    |
| popD1-146-3Asc | TAATATggcgcgccTCAGCCGTTCTTCAACGCGCCGAGGCTGCCGACCAC                              | 3' primer to clone PopD(1-146) into pAC $\lambda$ CI35                                 |
| popD58-5Not    | AAAAAgcggccgcACTCGACCCGGTGCGCATGGAA GCGGCCGG                                    | 5' primer to clone PopD beginning at residue 58 into pAC $\lambda$ CI35                |
| pcrH-3Asc      | AAAAAgcgcgccTCAAGCGTTATCGGATTCATAT                                              | 3' primer to clone pcrH ORF into pBR $\alpha$ 35                                       |
